# Supplementary material for: Health-Related Quality of Life (HRQoL) in Neuroendocrine Tumors: A Systematic Review
Source: MDPI journal article supplement (doi:10.3390/cancers14061428), 2022-03-10
Supplement: s1 [file s1]

**Table S1.** Prospective and Observational Studies in NET Patients with Reporting of HRQoL Outcome Measures.

| Study                                    | Type of Study         | Sample Size | Treatment                                                                                              | Tumor Sub-type | HRQoL Measure                  |
|------------------------------------------|-----------------------|-------------|--------------------------------------------------------------------------------------------------------|----------------|--------------------------------|
| O'Toole et al., 2000[35]                 | Prospective study     | 33          | octreotide followed by lanreotide                                                                      | GI NETs        | ISPN                           |
| Jacobsen & Hanssen, 1995[36]             | Prospective Study     | 11          | Octreotide vs. placebo                                                                                 | GI NETs        | GHQ-30, PAIS                   |
| Larsson et al., 2001[37]                 | Prospective study     | 24          | interferon; somatostatin analog; interferon + somatostatin analog                                      | GI NETs        | QLQ-C30                        |
| Kwekkeboom et al., 2003[38]              | Prospective study     | 35          | <sup>177</sup> Lu-DOTATATE                                                                             | GI NETs        | QLQ-C30                        |
| Pasieka et al., 2004[39]                 | Prospective study     | 24          | <sup>131</sup> I- meta- iodbenzylguanidin; <sup>111</sup> In-octreotide                                | NETs           | adhoc questionnaire            |
| Teunissen et al., 2004[40]               | Prospective study     | 50          | <sup>177</sup> Lu-DOTATATE                                                                             | NETs           | QLQ-C30                        |
| Fröjd et al., 2007; 2009[41,42]          | Prospective study     | 36          | interferon; octreotide; interferon + octreotide; chemotherapy; octreotide + chemotherapy; no treatment | NETs           | QLQ-C30                        |
| Larsson & Janson, 2008[43]               | Prospective study     | 18          | Interferon + erythropoietin                                                                            | GI NETs        | QLQ-C30, FACT-An               |
| Kalinowski et al., 2009[44]              | Prospective study     | 9           | <sup>90</sup> Y-microspheres                                                                           | NETs           | QLQ-C30, QLQ-LMC21             |
| Haugland et al., 2013[45]                | Prospective study     | 37          | Multidisciplinary educational intervention                                                             | GI NETs        | SF-36                          |
| Spolverato et al., 2015[46]              | Prospective study     | 85          | surgical vs. nonsurgical treatment                                                                     | NETs           | self-constructed questionnaire |
|                                          |                       |             |                                                                                                        |                |                                |
| Larsson et al., 1998[47]                 | Cross-sectional study | 17          | interferon; somatostatin analog; interferon + somatostatin analog                                      | NETs           | QLQ-C30                        |
| Larsson, Sjöden et al., 1999[48]         | Cross-sectional study | 119         | interferon + octreotide; interferon; octreotide; chemotherapy; radiation; omeprazole; no treatment     | NETs           | QLQ-C30                        |
| Larsson, von Essen et al., 1999[49]      | Cross-sectional study | 99          | interferon; somatostatin analog; interferon + somatostatin analog                                      | NETs           | QLQ-C30                        |
| von Essen et al., 2002[50]               | Cross-sectional study | 85          | interferon; somatostatin analog; interferon + somatostatin analog                                      | GI NETs        | QLQ-C30                        |
| Berglund et al., 2003[51]                | Cross-sectional study | 36          | Not specified                                                                                          | GI NETs        | HADS, IES, LOT, SF-36          |
| Larsson et al., 2003[52]                 | Cross-sectional study | 19          | interferon; somatostatin analog; interferon + somatostatin analog                                      | NETs           | interviews                     |
| Davies et al., 2006[53]                  | Cross-sectional study | 180         | Not specified                                                                                          | NETs           | QLQ-GI.NET21, QLQ-C30          |
| Larsson et al., 2007[54]                 | Cross-sectional study | 83          | Interferon/octreotide; chemotherapy; radiation; omeprazole; no treatment                               | NETs           | QLQ-C30                        |
| You et al., 2007[55]                     | Cross-sectional study | 50          | surgery                                                                                                | GI NETs        | QLQ-C30, GQLI                  |
| Haugland et al., 2009[56]                | Cross-sectional study | 96          | interferon, somatostatin analog; interferon + somatostatin analog; chemotherapy; no treatment          | GI NETs        | SF-36                          |
| Pezzilli et al., 2009[57]                | Cross-sectional study | 44          | somatostatin analog; somatostatin analog + other; no treatment                                         | GI NETs        | SF-12, GHQ-12                  |
| van der Horst-Schrivers et al., 2009[58] | Cross-sectional study | 43          | somatostatin analog; interferon; somatostatin analog + interferon                                      | GI NETs        | QLQ-C30                        |

|                              |                       |     |                                                                                          |         |                                                   |
|------------------------------|-----------------------|-----|------------------------------------------------------------------------------------------|---------|---------------------------------------------------|
| Pezzilli et al., 2010[59]    | Cross-sectional study | 44  | somatostatin analog; interferon; chemotherapy; somatostatin analog + other; no treatment | GI NETs | SF-12                                             |
| Vinik et al., 2011[60]       | Cross-sectional study | 29  | Not specified                                                                            | NETs    | Norfolk QOL-NET                                   |
| Beaumont et al., 2012[61]    | Cross-sectional study | 663 | surgery; surgery + SSA; other                                                            | NETs    | SF-36, PROMIS global health short form, PROMIS-29 |
| Petzel et al., 2012 [62]     | Cross-sectional study | 240 | Not specified                                                                            | GI NETs | FACT-Hep                                          |
| Pavel et al., 2013[63]       | Cross-sectional study | 126 | everolimus                                                                               | GI NETs | QLQ-C30, QLQ-GI.NET21                             |
| Yadegarfar et al., 2013[64]  | Cross-sectional study | 253 | Not specified                                                                            | NETs    | QLQ-GI.NET21, QLQ-C30                             |
| Gelhorn et al., 2016[65]     | Cross-sectional study | 96  | telotristat                                                                              | GI NETs | QLQ-C30, QLQ-GI.NET21                             |
| Haugland et al., 2016[66]    | Cross-sectional study | 196 | not specified                                                                            | GI NETs | SF-36                                             |
| Pearman et al., 2016[67]     | Cross-sectional study | 11  | surgery; surgery + SSA; other                                                            | NETs    | SF-36, PROMIS global health short form, PROMIS-29 |
| Ruszniewski et al., 2016[68] | Cross-sectional study | 273 | lanreotide autogel                                                                       | NETs    | QLQ-C30, QLQ-GI.NET21                             |
| Halperin et al., 2018[69]    | Cross-sectional study | 117 | somatostatin analog; surgical procedure; chemotherapy; interferon; targeted therapy      | NETs    | FACT-G, PROMIS-29                                 |
| Marinova et al., 2018[70]    | Cross-sectional study | 68  | PRRT                                                                                     | GI NETs | QLQ-C30                                           |
| Milanetto et al., 2018[71]   | Cross-sectional study | 100 | surgery                                                                                  | GI NETs | QLQ-C30, QLQ-GI.NET21                             |

Abbreviations: NET= Neuroendocrine tumors, HRQoL= Health Related Quality of Life, GI= Gastrointestinal, vs.= versus, IFN= interferon alpha; LAR = long-acting release, 5FU= 5-Fluorouracil, SSA= Somatostatin Analogue, PRRT= peptide receptor radionuclide therapy, EORTC QLQ-30= European Organization for Research and Treatment of Cancer Quality of Life Core Questionnaire, EORTC QLQ GI.NET21= NET specific EORTC QoL questionnaire, FACT-G = Functional Assessment of Cancer Therapy-General, GHQ= General Health Questionnaire, PROMIS- Patient-Reported Outcome Measurement Information System, SF=Item Short Form Health Survey, HADS=Hospital Anxiety and Depression Scale, IES= Impact of Event Scale, LOT=Life Orientation Test, FACIT= The Functional Assessment of Chronic Illness Therapy.
